# Supplementary material for: Triple Vectors Expand AAV Transfer Capacity in the Retina
Source: PubMed Central journal article supplement (PMC5835116; doi:10.1016/j.ymthe.2017.11.019), 2017-12-05
Supplement: mmc1.pdf [file mmc1.pdf]

YMTHE, Volume 26

## **Supplemental Information**

### **Triple Vectors Expand AAV Transfer Capacity in the Retina**

**Andrea Maddalena, Patrizia Tornabene, Paola Tiberi, Renato Minopoli, Anna Manfredi, Margherita Mutarelli, Settimio Rossi, Francesca Simonelli, Jurgen K. Naggert, Davide Cacchiarelli, and Alberto Auricchio**

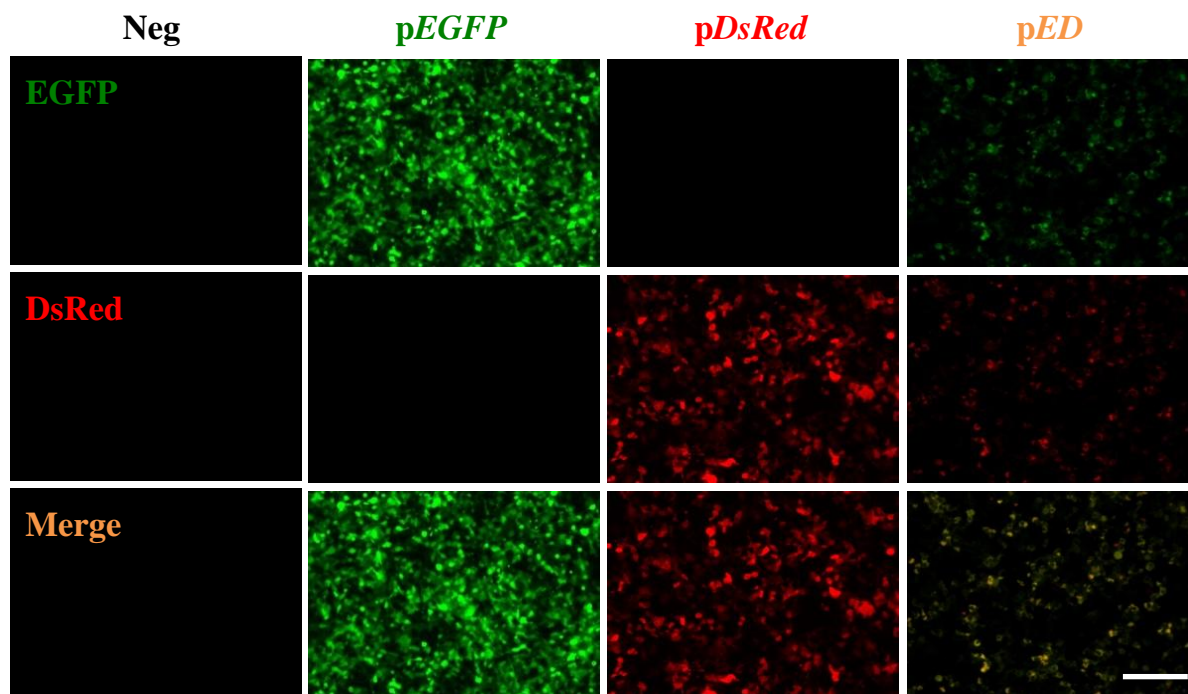

**Figure S1. The EGFP-DsRed-3xflag (ED) protein is less fluorescent than the corresponding native EGFP and DsRed reporters.**

Fluorescence analysis of HEK293 cells transfected with plasmids encoding either native EGFP (*pEGFP*), native DsRed (*pDsRed*) or the EGFP-DsRed-3xflag reporter protein construct (*pED*). EGFP, native EGFP fluorescence; DsRed, native DsRed fluorescence; merge: overlay of EGFP and DsRed. The scale bar (200  $\mu$ m) is depicted in the figure.

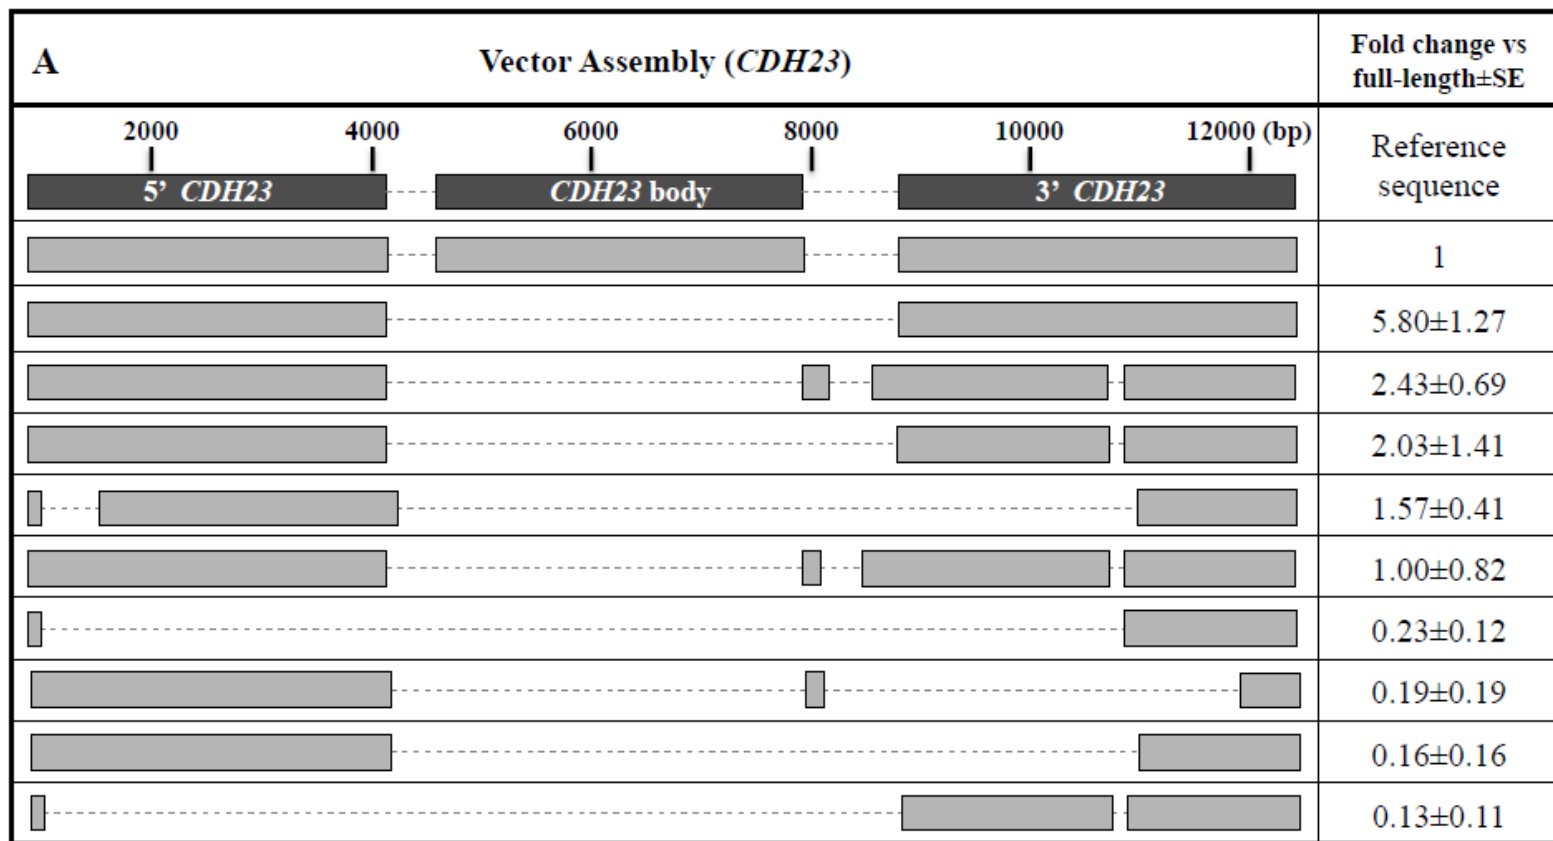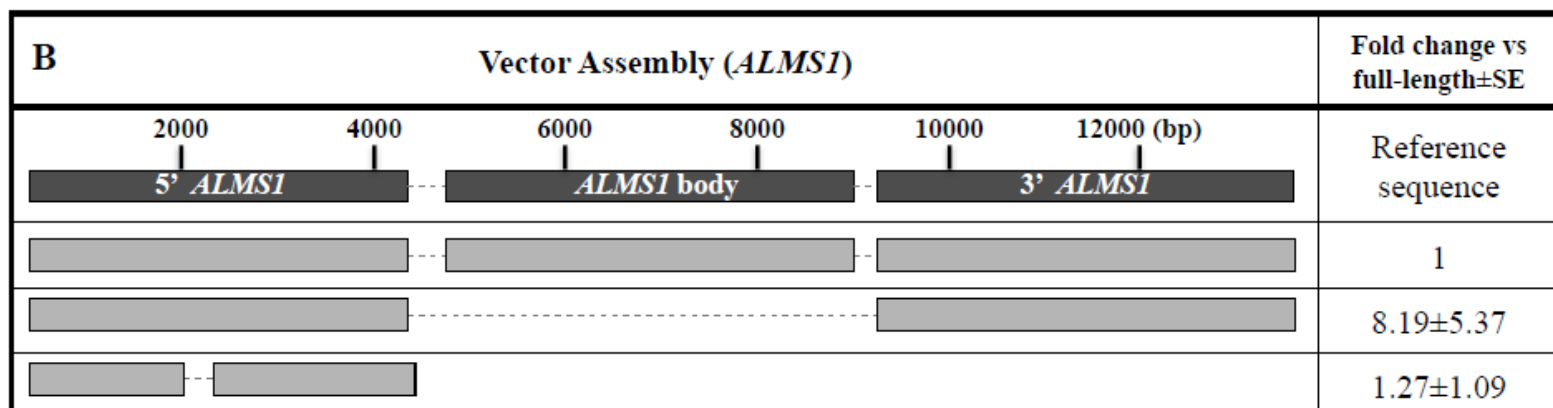

**Figure S2. Alternative transgene isoforms annotated by RNA-Seq analysis.**

For each transgene, the alternative isoforms are plotted below the full-length transcript. The relative abundance is quantified by mean and standard error of the normalized count ratio vs the full-length among 3 replicates.

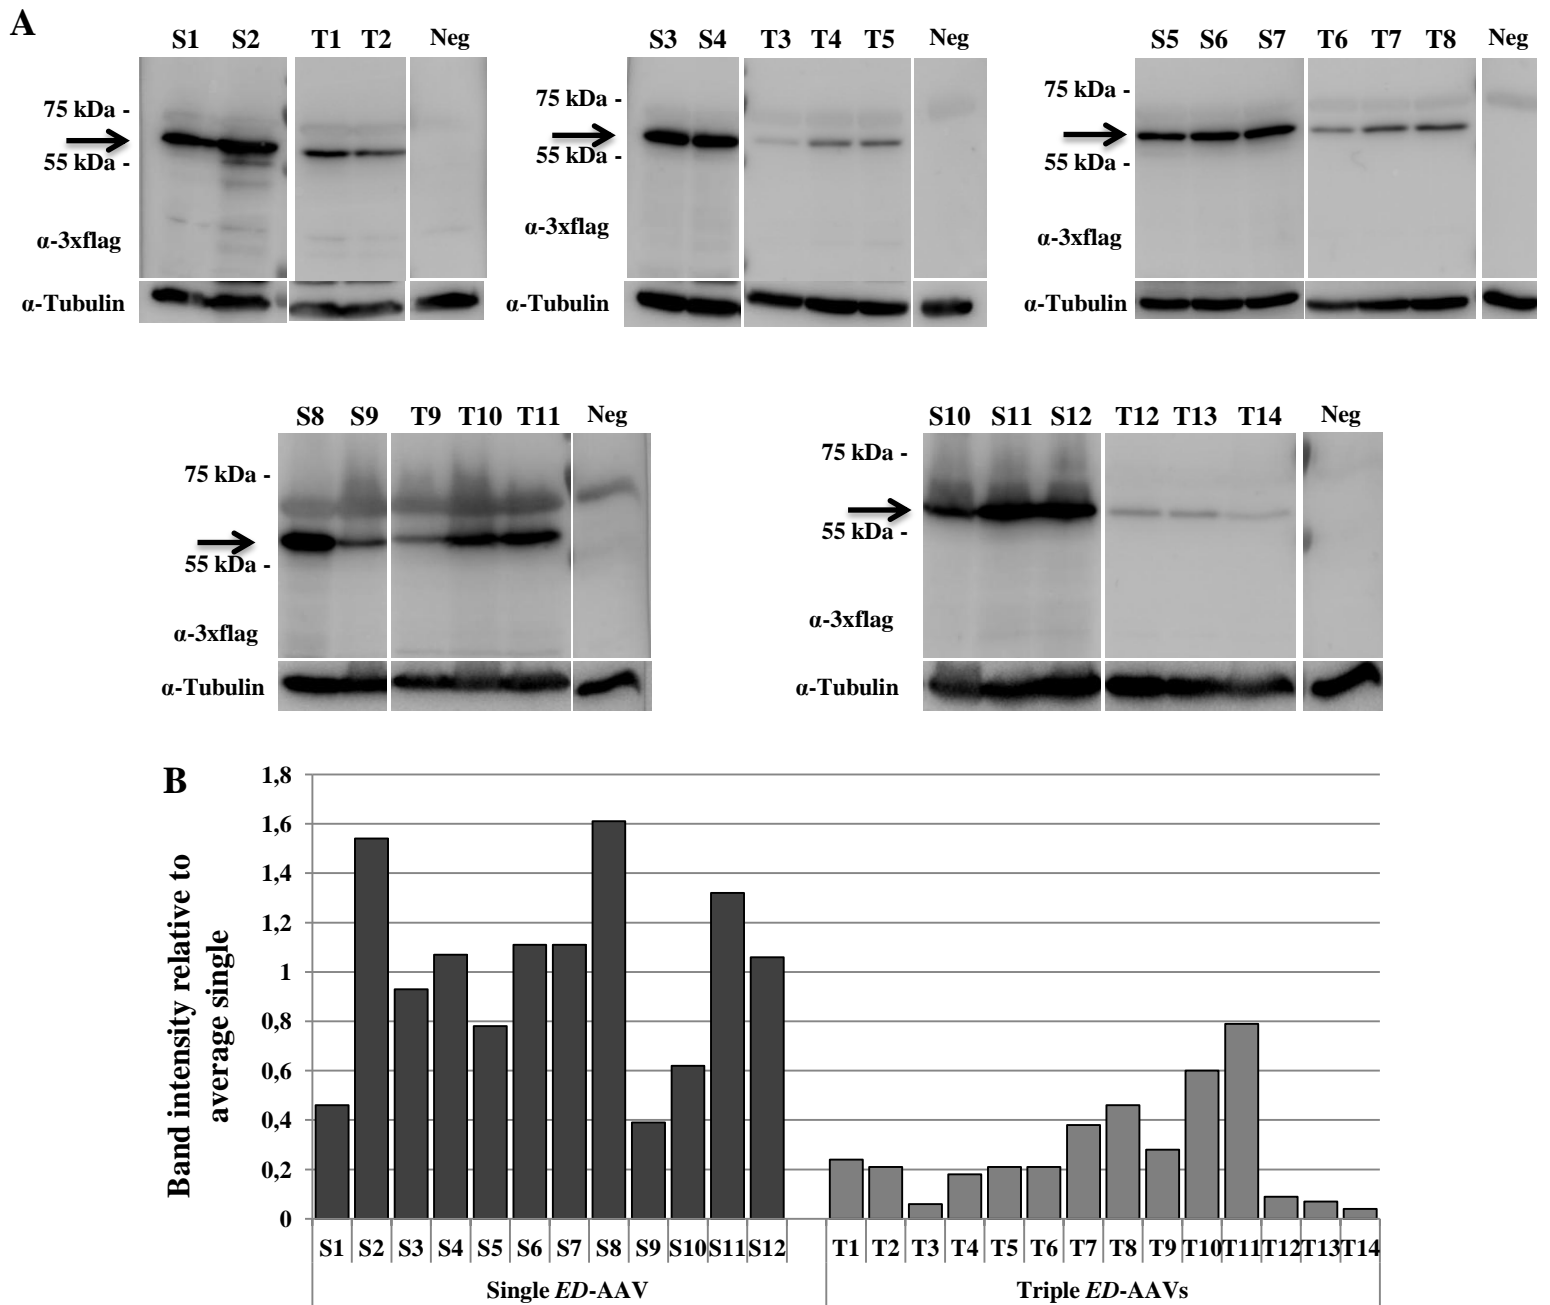

**Figure S3. Comparison between single and triple CMV-ED-AAV2/8 transduction in mouse retina.**

(A) WB analysis of eye cup lysates from C57BL/6J 2 months following subretinal injection of single and triple AAV2/8 vectors encoding for ED under the control of the ubiquitous CMV promoter.  $\alpha$ -3xflag, WB with anti-3xflag antibodies;  $\alpha$ - $\beta$ -Tubulin, WB with anti- $\beta$ -Tubulin antibodies, used as loading control. Neg, lysates from eye cups following injection with PBS. The molecular weight ladder is depicted on the left, 100-150  $\mu$ g of proteins were loaded. The arrow on the left indicates the full-length ED. S1-12: lysates from eye cups injected subretinally with single CMV-ED-AAV: T1-14: lysates from eye cups injected subretinally with triple CMV-ED-AAVs. Neg, lysates of eye cups following injection with PBS.

(B) Densitometric values of ED bands in (A). To compare data across different experiments, in each WB the average intensity of the bands deriving from single AAV transduced eye was set as 1 and the intensity of triple AAVs transduced eye was divided by that of single AAV transduced eye and calculated accordingly. S1-12: lysates from eye cups injected subretinally with single CMV-ED-AAV. T1-14: lysates from eye cups injected subretinally with triple CMV-ED-AAVs.

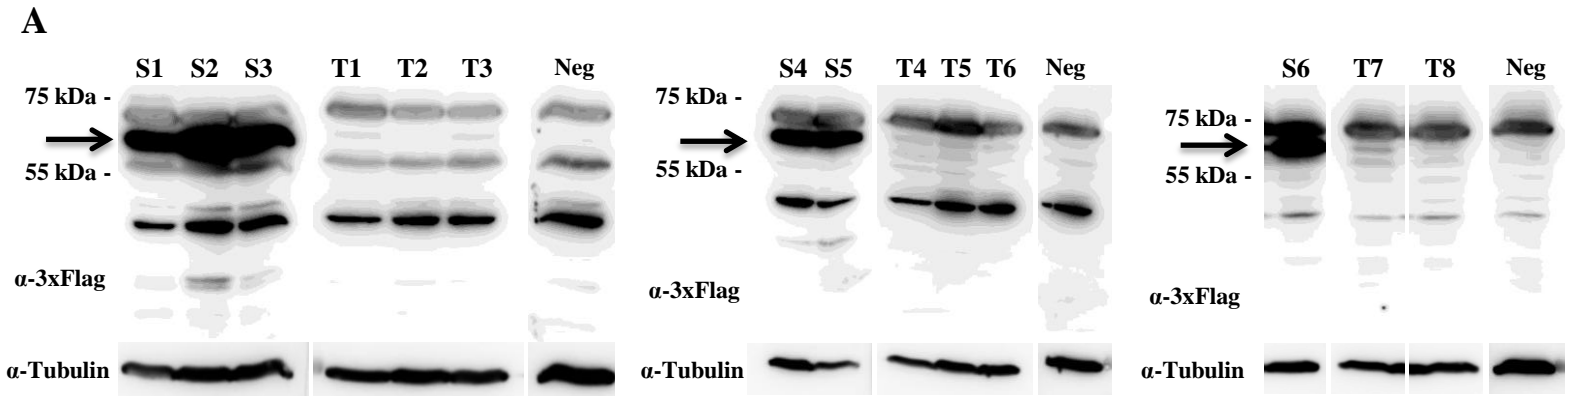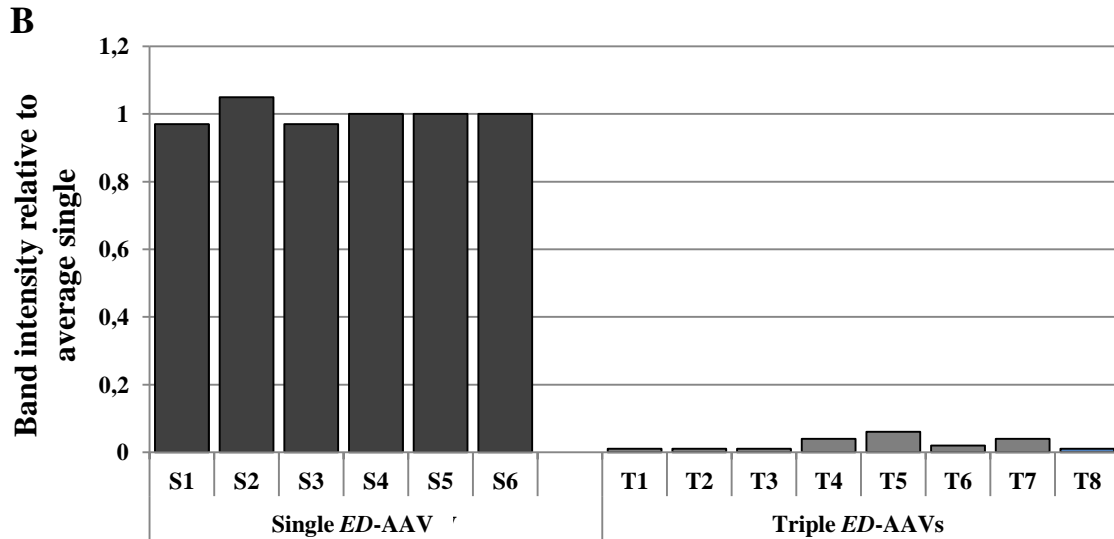

**Figure S4. Comparison between single and triple IRBP-ED-AAV2/8 transduction in mouse retina.**

(A) WB analysis of eye cup lysates from C57BL/6J 2 months following subretinal injection of single and triple AAV2/8 vectors encoding for ED under the control of the PR specific IRBP promoter.  $\alpha$ -3xflag, WB with anti-3xflag antibodies;  $\alpha$ - $\beta$ -Tubulin, WB with anti- $\beta$ -Tubulin antibodies, used as loading control. Neg, lysates from eye cups following injection with PBS. The molecular weight ladder is depicted on the left, 200  $\mu$ g of proteins were loaded. The arrow on the left indicates the full-length ED. S1-6, lysates from eye cups injected subretinally with single IRBP-ED-AAV. T1-8, lysates from eye cups injected subretinally with triple IRBP-ED-AAVs. Neg, lysates of eye cups following injection with PBS.

(B) Densitometric values of ED bands in (A). To compare data across different experiments, in each WB the average intensity of the bands deriving from single AAV transduced eye was set as 1 and the intensity of triple AAVs transduced eye was divided by that of single AAV transduced eye and calculated accordingly. S1-6: lysates from eye cups injected subretinally with single IRBP-ED-AAV. T1-8: lysates from eye cups injected subretinally with triple IRBP-ED-AAVs.

| Primer name           | Sequence              |
|-----------------------|-----------------------|
| CDH A                 | ctgccaactggggtatcttc  |
| CDH B                 | ctgttggaagcggcact     |
| CDH C                 | tcagcacgtgactggaattt  |
| CDH D                 | acatcgtcgggattgtagcga |
| CDH E                 | gtaagtggccaccagttccct |
| CDH F                 | agaccatgacggcgactata  |
| mCDH wt Forw          | catcgtggccaaggatgacac |
| mCDH wt rev           | gaatgctctgggaggtcgt   |
| ALMS A                | ctccttacttctccaccac   |
| ALMS B                | cttctacagccacaccgaga  |
| ALMS C                | tgctcttcagtcagatggg   |
| ALMS D                | gccagcgtaggtgtgtcaa   |
| ALMS E                | cttctggctttgccttcgtc  |
| ALMS F                | aggttccttgggacgactac  |
| mALMS wt forw         | taggacgtgaccgtggatact |
| mALMS wt rev          | gccttgtggacttcgtaagc  |
| h $\beta$ -ACTIN forw | gcgagaagatgaccagatc   |
| h $\beta$ -ACTIN rev  | ggatagcacagcctggatag  |
| mGAPDH forw           | agcaaggacactgagcaagag |
| mGAPDH rev            | gcagcgaactttattgatggt |

**Table S1.**

List of primers used for Real-Time quantitative PCR. Fw: forward primer; Rev: reverse primer; wt: wild type.
